# Supplementary material for: Assessing Australian women’s knowledge and knowledge preferences about long-term health after hypertensive disorders of pregnancy: a survey study
Source: PubMed Central journal article supplement — BMJ Open. 2020 Dec 17;10(12):e042920. doi: 10.1136/bmjopen-2020-042920 (PMC7747529; doi:10.1136/bmjopen-2020-042920), 2020-12-17
Supplement: bmjopen-2020-042920supp002.pdf [file bmjopen-2020-042920supp002.pdf]

Supplementary Table 1: Current CVD risk factors of HDP and non-HDP women (Multiple answers collected) in order of frequency

|                                   | <b>GH</b>     | <b>PE</b>     | <b>CH</b>     | <b>Total HDP</b> | <b>non-HDP</b> | <b>P<br/>HDP vs<br/>non HDP</b> |
|-----------------------------------|---------------|---------------|---------------|------------------|----------------|---------------------------------|
|                                   | <b>n=15</b>   | <b>n=143</b>  | <b>n=16</b>   | <b>n=174</b>     | <b>n=92</b>    |                                 |
|                                   | <b>n (%)*</b> | <b>n (%)*</b> | <b>n (%)*</b> | <b>n (%)*</b>    | <b>n (%)*</b>  |                                 |
| None of the options               | 6 (40)        | 52 (36)       | 2 (13)        | 60 (34)          | 57 (62)        | <0.001                          |
| Obesity                           | 5 (33)        | 38 (27)       | 7 (44)        | 50 (29)          | 10 (11)        | 0.001                           |
| Family History Heart disease      | 3 (20)        | 37 (26)       | 6 (38)        | 46 (26)          | 14 (15)        | 0.037                           |
| Hypertension                      | 3 (20)        | 30 (21)       | 12 (75)       | 35 (20)          | 0 (0)          | <0.001                          |
| Renal problems                    | 0 (0)         | 21 (15)       | 2 (13)        | 23 (13)          | 0 (0)          | <0.001                          |
| Smoking                           | 0 (0)         | 10 (7)        | 3 (19)        | 13 (7)           | 2 (2)          | 0.075                           |
| History of cardiovascular event** | 0 (0)         | 1 (1)         | 0 (0)         | 1 (1)            | 0 (0)          | 0.356                           |
| Diabetes                          | 0 (0)         | 5 (3)         | 2 (13)        | 7 (4)            | 0 (0)          | 0.014                           |
| Alcohol consumption               | 0 (0)         | 0 (0)         | 1 (6)         | 1 (1)            | 0 (0)          | 0.356                           |
| High Cholesterol                  | 0 (0)         | 0 (0)         | 0 (0)         | 0 (0)            | 0 (0)          | -                               |

\*Table represents frequency of each option; percentages add to over 100% as women were asked to select any/all that applied.

\*\*angina, stroke or heart attack

PE = preeclampsia GH = gestational hypertension CH= chronic hypertension worsening in pregnancy and/or with superimposed preeclampsia, HDP= hypertensive disorder of pregnancy
