# Supplementary material for: Assessing Australian women’s knowledge and knowledge preferences about long-term health after hypertensive disorders of pregnancy: a survey study
Source: PubMed Central journal article supplement — BMJ Open. 2020 Dec 17;10(12):e042920. doi: 10.1136/bmjopen-2020-042920 (PMC7747529; doi:10.1136/bmjopen-2020-042920), 2020-12-17
Supplement: bmjopen-2020-042920supp003.pdf [file bmjopen-2020-042920supp003.pdf]

## Supplementary Table 2: Chronic Hypertension

a) Women with HDP likelihood of risk compared to non-HDP (“Do you think you have a lower/same/higher chance of getting the following”)

|                       | <b>GH pregnancy<br/>n=15</b> | <b>PE pregnancy<br/>n=143</b> | <b>CH pregnancy<br/>n=16</b> | <b>Total<br/>n=174</b> |
|-----------------------|------------------------------|-------------------------------|------------------------------|------------------------|
|                       | <b>n (%)</b>                 | <b>n (%)</b>                  | <b>n (%)</b>                 | <b>n (%)</b>           |
| Less likely           | 0 (0)                        | 1 (1)                         | 0 (0)                        | 1 (1)                  |
| Same likelihood       | 2 (13)                       | 14 (10)                       | 1 (6)                        | 17 (10)                |
| More likely (correct) | 8 (53)                       | 111 (78)                      | 13 (81)                      | 132 (76)               |
| I do not know         | 5 (33)                       | 17 (12)                       | 2 (13)                       | 24 (14)                |

PE = preeclampsia GH = gestational hypertension CH= chronic hypertension worsening in pregnancy and/or with superimposed preeclampsia, HDP= hypertensive disorder of pregnancy

b) Women without HDP likelihood of risk compared to HDP (“Do you think you have a lower/same/higher chance of getting the following”)

|                       | <b>non-HDP<br/>n=92</b> |
|-----------------------|-------------------------|
|                       | <b>n (%)</b>            |
| Less likely (correct) | 57 (62)                 |
| Same likelihood       | 22 (24)                 |
| More likely           | 1 (1)                   |
| I do not know         | 12 (13)                 |

PE = preeclampsia GH = gestational hypertension CH= chronic hypertension worsening in pregnancy and/or with superimposed preeclampsia, HDP= hypertensive disorder of pregnancy
