# Supplementary material for: Assessing Australian women’s knowledge and knowledge preferences about long-term health after hypertensive disorders of pregnancy: a survey study
Source: PubMed Central journal article supplement — BMJ Open. 2020 Dec 17;10(12):e042920. doi: 10.1136/bmjopen-2020-042920 (PMC7747529; doi:10.1136/bmjopen-2020-042920), 2020-12-17
Supplement: bmjopen-2020-042920supp004.pdf [file bmjopen-2020-042920supp004.pdf]

## Supplementary Table 3: Diabetes

a) Women with HDP likelihood of risk compared to non-HDP (“Do you think you have a lower/same/higher chance of getting the following”)

|                       | <b>GH pregnancy<br/>n=15</b> | <b>PE pregnancy<br/>n=143</b> | <b>CH pregnancy<br/>n=16</b> | <b>Total<br/>n=174</b> |
|-----------------------|------------------------------|-------------------------------|------------------------------|------------------------|
|                       | <b>n (%)</b>                 | <b>n (%)</b>                  | <b>n (%)</b>                 | <b>n (%)</b>           |
| Less likely           | 0 (0)                        | 1 (1)                         | 0 (0)                        | 1 (1)                  |
| Same likelihood       | 3 (20)                       | 61 (43)                       | 5 (31)                       | 69 (40)                |
| More likely (correct) | 4 (27)                       | 35 (25)                       | 5 (31)                       | 44 (25)                |
| I do not know         | 8 (53)                       | 44 (31)                       | 6 (38)                       | 58 (33)                |

PE = preeclampsia GH = gestational hypertension CH= chronic hypertension worsening in pregnancy and/or with superimposed preeclampsia, HDP= hypertensive disorder of pregnancy

b) Women without HDP likelihood of risk compared to HDP (“Do you think you have a lower/same/higher chance of getting the following”)

|                       | <b>non-HDP<br/>n= 92</b> |
|-----------------------|--------------------------|
|                       | <b>n (%)</b>             |
| Less likely (correct) | 32 (35)                  |
| Same likelihood       | 39 (42)                  |
| More likely           | 4 (4)                    |
| I do not know         | 17 (19)                  |

PE = preeclampsia GH = gestational hypertension CH= chronic hypertension worsening in pregnancy and/or with superimposed preeclampsia, HDP= hypertensive disorder of pregnancy
