# Supplementary material for: Assessing Australian women’s knowledge and knowledge preferences about long-term health after hypertensive disorders of pregnancy: a survey study
Source: PubMed Central journal article supplement — BMJ Open. 2020 Dec 17;10(12):e042920. doi: 10.1136/bmjopen-2020-042920 (PMC7747529; doi:10.1136/bmjopen-2020-042920), 2020-12-17
Supplement: bmjopen-2020-042920supp012.pdf [file bmjopen-2020-042920supp012.pdf]

## Supplementary Table 11: Seizures

a) Women with HDP likelihood of risk compared to non-HDP (“Do you think you have a lower/same/higher chance of getting the following”)

|                           | <b>GH pregnancy<br/>n=15</b> | <b>PE pregnancy<br/>n=143</b> | <b>CH pregnancy<br/>n=16</b> | <b>Total<br/>n=174</b> |
|---------------------------|------------------------------|-------------------------------|------------------------------|------------------------|
|                           | <b>n (%)</b>                 | <b>n (%)</b>                  | <b>n (%)</b>                 | <b>n (%)</b>           |
| Less likely               | 0 (0)                        | 0 (0)                         | 0 (0)                        | 0 (0)                  |
| Same likelihood (correct) | 4 (27)                       | 41 (29)                       | 2 (13)                       | 47 (27)                |
| More likely               | 1 (7)                        | 41 (29)                       | 4 (27)                       | 46 (27)                |
| I do not know             | 10 (67)                      | 60 (42)                       | 9 (60)                       | 79 (46)                |

PE = preeclampsia GH = gestational hypertension CH= chronic hypertension worsening in pregnancy and/or with superimposed preeclampsia, HDP= hypertensive disorder of pregnancy

b) Women without HDP likelihood of risk compared to HDP (“Do you think you have a lower/same/higher chance of getting the following”)

|                           | <b>non-HDP<br/>n=92</b> |
|---------------------------|-------------------------|
|                           | <b>n (%)</b>            |
| Less likely               | 25 (27)                 |
| Same likelihood (correct) | 40 (44)                 |
| More likely               | 0 (0)                   |
| I do not know             | 27 (29)                 |

PE = preeclampsia GH = gestational hypertension CH= chronic hypertension worsening in pregnancy and/or with superimposed preeclampsia, HDP= hypertensive disorder of pregnancy
