# Supplementary material for: Assessing Australian women’s knowledge and knowledge preferences about long-term health after hypertensive disorders of pregnancy: a survey study
Source: PubMed Central journal article supplement — BMJ Open. 2020 Dec 17;10(12):e042920. doi: 10.1136/bmjopen-2020-042920 (PMC7747529; doi:10.1136/bmjopen-2020-042920), 2020-12-17
Supplement: bmjopen-2020-042920supp013.pdf [file bmjopen-2020-042920supp013.pdf]

Supplementary Table 12: Proportion of participants scoring 'high', 'moderate' and 'low' by type of HDP and non-HDP

|                      | <b>GH</b><br>n=15<br>n(%) | <b>PE</b><br>n=143<br>n(%) | <b>CH</b><br>n=16<br>n(%) | <b>P</b><br>GH vs PE | <b>P</b><br>GH vs CH | <b>P</b><br>PE vs CH | <b>HDP</b><br>n=174<br>n(%) | <b>non-HDP</b><br>n=92<br>n(%) | <b>P</b><br>HDP vs<br>non- HDP |
|----------------------|---------------------------|----------------------------|---------------------------|----------------------|----------------------|----------------------|-----------------------------|--------------------------------|--------------------------------|
| High (score 8-10)    | 4 (27)                    | 48 (34)                    | 5 (31)                    | 0.59                 | 0.78                 | 0.67                 | 57 (33)                     | 30 (33)                        | 0.98                           |
| Moderate (score 5-7) | 3 (20)                    | 52 (36)                    | 7 (44)                    | 0.21                 | 0.16                 | 0.56                 | 62 (36)                     | 25 (27)                        | 0.16                           |
| Low (score 0-4)      | 8 (53)                    | 43 (30)                    | 4 (25)                    | 0.67                 | 0.11                 | 0.85                 | 55 (32)                     | 37 (40)                        | 0.16                           |
| Total                | 15 (100)                  | 143 (100)                  | 16 (100)                  | -                    | -                    | -                    | 174 (101)                   | 92 (100)                       | -                              |

PE = preeclampsia GH = gestational hypertension CH= chronic hypertension worsening in pregnancy and/or with superimposed preeclampsia, HDP= hypertensive disorder of pregnancy.

The colour coding in addition to the mean scores aims to highlight the areas of 'low' (red), 'moderate' (orange) and 'high' (green) knowledge.

|  |          |
|--|----------|
|  | LOW      |
|  | MODERATE |
|  | HIGH     |
