# Supplementary material for: Assessing Australian women’s knowledge and knowledge preferences about long-term health after hypertensive disorders of pregnancy: a survey study
Source: PubMed Central journal article supplement — BMJ Open. 2020 Dec 17;10(12):e042920. doi: 10.1136/bmjopen-2020-042920 (PMC7747529; doi:10.1136/bmjopen-2020-042920), 2020-12-17
Supplement: bmjopen-2020-042920supp014.pdf [file bmjopen-2020-042920supp014.pdf]

Supplementary Table 13: Means of risk factor knowledge of women with a history of preeclampsia listed by time elapsed since HDP

|                                                               | PE<br>n=143 | PE n=143       |                 |              |              |             | P    | PE n=143   |            | P    |
|---------------------------------------------------------------|-------------|----------------|-----------------|--------------|--------------|-------------|------|------------|------------|------|
|                                                               | ALL         | 0 - 6<br>month | 6 - 12<br>month | 1-2<br>years | 2-3<br>years | >3<br>years |      | < 3        | > 3        |      |
|                                                               |             | n=26           | n=19            | n=32         | n=20         | n=46        |      | n=97       | n=46       |      |
| Chronic Hypertension                                          | 0.78        | 0.77           | 0.89            | 0.78         | 0.80         | 0.72        | 0.65 | 0.80       | 0.72       | 0.27 |
| Diabetes                                                      | 0.24        | 0.23           | 0.42            | 0.31         | 0.10         | 0.20        | 0.14 | 0.27       | 0.20       | 0.35 |
| Renal Disease                                                 | 0.54        | 0.50           | 0.74            | 0.41         | 0.65         | 0.52        | 0.17 | 0.55       | 0.52       | 0.78 |
| Heart Attack                                                  | 0.69        | 0.58           | 0.89            | 0.66         | 0.70         | 0.67        | 0.25 | 0.69       | 0.67       | 0.84 |
| Repeat HDP                                                    | 0.90        | 0.88           | 0.89            | 0.94         | 0.95         | 0.85        | 0.68 | 0.92       | 0.85       | 0.25 |
| Stroke                                                        | 0.62        | 0.65           | 0.68            | 0.50         | 0.65         | 0.65        | 0.62 | 0.61       | 0.65       | 0.62 |
| Heart Disease                                                 | 0.69        | 0.62           | 0.79            | 0.63         | 0.65         | 0.76        | 0.50 | 0.66       | 0.76       | 0.21 |
| PVD                                                           | 0.50        | 0.54           | 0.53            | 0.53         | 0.40         | 0.50        | 0.90 | 0.51       | 0.50       | 0.95 |
| Breast Cancer*                                                | 0.52        | 0.46           | 0.37            | 0.63         | 0.40         | 0.59        | 0.25 | 0.48       | 0.59       | 0.26 |
| Seizures*                                                     | 0.29        | 0.15           | 0.16            | 0.41         | 0.45         | 0.26        | 0.07 | 0.30       | 0.26       | 0.64 |
| <b>OVERALL<br/>MEAN<br/>KNOWLEDGE<br/>SCORE OUT<br/>OF 10</b> | <b>5.8</b>  | <b>5.4</b>     | <b>6.4</b>      | <b>5.8</b>   | <b>5.8</b>   | <b>5.7</b>  | 0.83 | <b>5.8</b> | <b>5.7</b> | 0.89 |

The colour coding in addition to the mean scores aims to highlight the areas of 'low' (red), 'moderate' (orange) and 'high' (green) knowledge.

| MEAN SCORE |           |  |
|------------|-----------|--|
| LOW        | 0-0.40    |  |
| MODERATE   | 0.41-0.70 |  |
| HIGH       | 0.71-1    |  |
