# Supplementary material for: Assessing Australian women’s knowledge and knowledge preferences about long-term health after hypertensive disorders of pregnancy: a survey study
Source: PubMed Central journal article supplement — BMJ Open. 2020 Dec 17;10(12):e042920. doi: 10.1136/bmjopen-2020-042920 (PMC7747529; doi:10.1136/bmjopen-2020-042920), 2020-12-17
Supplement: bmjopen-2020-042920supp015.pdf [file bmjopen-2020-042920supp015.pdf]

Supplementary Table 14: HDP and non-HDP women's answers to timing of rise of risk with signs and symptoms starting to show

|                                                                         | <b>GH</b>       | <b>PE</b>        | <b>CH</b>       | <b>HDP</b>       | <b>Non HDP</b>  | <b>P</b>              |
|-------------------------------------------------------------------------|-----------------|------------------|-----------------|------------------|-----------------|-----------------------|
|                                                                         | <b>n=15</b>     | <b>n=143</b>     | <b>n=16</b>     | <b>n=174</b>     | <b>n=92</b>     | <b>HDP vs non-HDP</b> |
|                                                                         | <b>n (%)*</b>   | <b>n (%)*</b>    | <b>n (%)*</b>   | <b>n (%)*</b>    | <b>n (%)*</b>   |                       |
| <10 years                                                               | 4 (27)          | 42 (29)          | 9 (56)          | 55 (32)          | 41 (45)         | 0.036                 |
| 10-15 years                                                             | 3 (20)          | 28 (20)          | 2 (13)          | 33 (19)          | 15 (16)         | 0.591                 |
| 16-20 years                                                             | 0 (0)           | 13 (9)           | 0 (0)           | 13 (8)           | 1 (1)           | 0.013                 |
| >20 years                                                               | 3 (20)          | 5 (4)            | 0 (0)           | 8 (5)            | 2 (2)           | 0.302                 |
| Not sure/don't know                                                     | 1 (7)           | 48 (34)          | 1 (6)           | 52 (30)          | 33 (36)         | 0.319                 |
| I don't think I will get any of these as I maintain a healthy lifestyle | 4 (27)          | 7 (5)            | 2 (13)          | 13 (8)           | N/A             | -                     |
| <b>TOTAL</b>                                                            | <b>15 (101)</b> | <b>143 (101)</b> | <b>16 (101)</b> | <b>174 (102)</b> | <b>92 (100)</b> |                       |

\* Percentages may not add to 100% as figures are rounded to whole numbers only

PE = preeclampsia GH = gestational hypertension CH= chronic hypertension worsening in pregnancy and/or with superimposed preeclampsia, HDP= hypertensive disorder of pregnancy
