# Supplementary material for: Assessing Australian women’s knowledge and knowledge preferences about long-term health after hypertensive disorders of pregnancy: a survey study
Source: PubMed Central journal article supplement — BMJ Open. 2020 Dec 17;10(12):e042920. doi: 10.1136/bmjopen-2020-042920 (PMC7747529; doi:10.1136/bmjopen-2020-042920), 2020-12-17
Supplement: bmjopen-2020-042920supp016.pdf [file bmjopen-2020-042920supp016.pdf]

Supplementary Table 15: Proportion of conditions discussed by HDP sub-type when addressing future risk (multiple answers collected) within and over 3 years since last HDP (complements Table 3 which illustrates a summary of this data)

|                                    | GH<br>n=15<br>N (%) |               | PE<br>n = 143<br>N (%) |                | CH<br>n = 16<br>N (%) |               | Total<br>n = 174<br>N (%) |                | Overall<br>Total<br>n = 174<br>N (%) | P value<br>< 3 yrs<br>vs<br>>3 yrs |
|------------------------------------|---------------------|---------------|------------------------|----------------|-----------------------|---------------|---------------------------|----------------|--------------------------------------|------------------------------------|
|                                    | <3yrs               | >3yrs         | <3yrs                  | >3yrs          | <3yrs                 | >3yrs         | <3yrs                     | >3yrs          |                                      |                                    |
| <i>HDP next pregnancy</i>          | 3 (23)              | 1 (50)        | 47 (48)                | 21 (46)        | 5 (38)                | 2 (67)        | 55 (45)                   | 24 (47)        | 79 (45)                              | 0.78                               |
| <i>Chronic Hypertension</i>        | 4 (31)              | 1 (50)        | 47 (48)                | 16 (35)        | 4 (31)                | 2 (67)        | 55 (45)                   | 19 (37)        | 74 (43)                              | 0.37                               |
| <b>No discussion</b>               | <b>7 (54)</b>       | <b>1 (50)</b> | <b>33 (34)</b>         | <b>17 (37)</b> | <b>5 (38)</b>         | <b>1 (33)</b> | <b>45 (37)</b>            | <b>19 (37)</b> | <b>64 (37)</b>                       | <b>0.93</b>                        |
| <i>Lifestyle changes</i>           | 4 (31)              | -             | 26 (27)                | 6 (13)         | 2 (15)                | 2 (67)        | 32 (26)                   | 8 (16)         | 40 (23)                              | 0.14                               |
| <i>Heart Attack</i>                | 1 (8)               | -             | 20 (21)                | 6 (13)         | 1 (8)                 | 1 (33)        | 22 (18)                   | 7 (14)         | 29 (17)                              | 0.50                               |
| <i>Renal Disease</i>               | 1 (8)               | -             | 20 (21)                | 3 (7)          | 2 (15)                | 1 (33)        | 23 (19)                   | 4 (8)          | 27 (16)                              | 0.07                               |
| <i>Stroke</i>                      | 1 (8)               | 1 (50)        | 18 (19)                | 4 (9)          | 1 (8)                 | 1 (33)        | 20 (16)                   | 6 (12)         | 26 (15)                              | 0.45                               |
| <i>Peripheral vascular disease</i> | -                   | -             | 15 (15)                | 5 (11)         | 1 (8)                 | -             | 16 (13)                   | 5 (10)         | 21 (12)                              | 0.56                               |
| <i>Cannot remember</i>             | 1 (8)               | -             | 4 (4)                  | 2 (4)          | 1 (8)                 | -             | 6 (5)                     | 2 (4)          | 8 (5)                                | 0.78                               |
